# Supplementary material for: Developing a Compost Quality Index (CQI) Based on the Electrochemical Quantification of Cd (HA) Reactivity
Source: MDPI journal article supplement (doi:10.3390/molecules28031503), 2023-02-03
Supplement: s1 [file s1]

## Supplementary Material

Data obtained through acid-base titrations following the methodology proposed by López et al. (2021) [16].

**Table S1:** Abundance of deprotonated groups at pH 7.0 ( $Q_{pH7.0}$ ) and the abundance of acid sites of the extracts HA, FA and DOM ( $M_T$ ,  $M_{T,HS}$  and  $M_{T,DOM}$ ). The abundance of acid sites of the extracts was calculated using Equations S3 and S4.

| Parameters |             |                                            | CVA* | CVDW* | CA   | CLW* | CUW* | CDDW* | CSS* | FLW  |
|------------|-------------|--------------------------------------------|------|-------|------|------|------|-------|------|------|
| HA         | $Q_{pH7.0}$ | (mmol g <sup>-1</sup> )                    | 4.18 | 4.53  | 4.92 | 4.23 | 5.39 | 5.43  | 3.57 | 3.74 |
|            | $M_T$       | (mmol g <sup>-1</sup> )                    | 6.65 | 7.13  | 8.28 | 7.14 | 8.95 | 8.73  | 6.32 | 5.68 |
|            | $M_{T,HS}$  | (mol kg <sub>compost</sub> <sup>-1</sup> ) | 0.12 | 0.1   | 0.09 | 0.14 | 0.1  | 0.08  | 0.09 | 0.18 |
| FA         | $Q_{pH7.0}$ | (mmol g <sup>-1</sup> )                    | 8.10 | 10.2  | 10.9 | 8.46 | 9.12 | 9.41  | 11.0 | 7.09 |
|            | $M_T$       | (mmol g <sup>-1</sup> )                    | 11.3 | 14.1  | 16.6 | 12.9 | 12.5 | 13.7  | 18.5 | 10.6 |
|            | $M_{T,HS}$  | (mol kg <sub>compost</sub> <sup>-1</sup> ) | 0.01 | 0.03  | 0.02 | 0.03 | 0.02 | 0.02  | 0.04 | 0.04 |
| DOM        | $Q_{pH7.0}$ | (mmol g <sup>-1</sup> )                    | 4.59 | 2.18  | 3.31 | 2.36 | 1.85 | 5.65  | 2.84 | 2.55 |
|            | $M_T$       | (mmol g <sup>-1</sup> )                    | 9.89 | 4.32  | 6.7  | 5.63 | 3.92 | 11.3  | 8.38 | 5.92 |
|            | $M_{T,DOM}$ | (mol kg <sub>compost</sub> <sup>-1</sup> ) | 0.22 | 0.62  | 0.10 | 0.97 | 0.43 | 0.26  | 1.17 | 1.09 |

\* Data from López et al. (2021) [16]

The carbon content of each extract  $C_{HS}$  and  $C_{DOM}$  were calculated using equations (S1) and (S2), for the HS and DOM, respectively:

$$C_{HS} = \frac{C}{100} \times Y \quad (S1)$$

$$C_{DOM} = \frac{DOC}{\frac{m_{compost}}{V}} \quad (S2)$$

where,  $C$  is the carbon content of the HS (% w/w),  $Y$  is the yield of the extractions (w/w, g kg<sup>-1</sup>),  $DOC$  is the concentration of dissolved organic carbon (mg L<sup>-1</sup>) and  $m_{compost}/V$  is the mass of compost per volume of solution used to prepared the equilibrium solution (50 g<sub>compost</sub> L<sup>-1</sup>).

**Table S2:** Carbon content of the extracts HA, FA and DOM and yield ( $Y$ ) of the extractions of HA and FA. The carbon content of each extract was calculated using Equations S1 and S2.

| Sample | HA    |                         |                                                    | FA    |                         |                                                    | DOM                       |                                                     |
|--------|-------|-------------------------|----------------------------------------------------|-------|-------------------------|----------------------------------------------------|---------------------------|-----------------------------------------------------|
|        | C (%) | Y (g kg <sup>-1</sup> ) | $C_{HA}$ (gC kg <sub>compost</sub> <sup>-1</sup> ) | C (%) | Y (g kg <sup>-1</sup> ) | $C_{FA}$ (gC kg <sub>compost</sub> <sup>-1</sup> ) | DOC (mg L <sup>-1</sup> ) | $C_{DOM}$ (gC kg <sub>compost</sub> <sup>-1</sup> ) |
| CVA    | 53.5* | 33.4*                   | 17.9                                               | 49.7* | 2.27*                   | 1.14                                               | 111*                      | 2.22                                                |
| CVDW   | 52.7* | 19.0*                   | 13.9                                               | 39.8* | 4.73*                   | 1.87                                               | 717*                      | 14.3                                                |
| CA     | 53.3  | 19.9*                   | 10.6                                               | 45.8* | 2.67*                   | 1.22                                               | 75.2*                     | 1.5                                                 |

|             |       |       |      |       |       |      |      |      |
|-------------|-------|-------|------|-------|-------|------|------|------|
| <b>CLW</b>  | 55.2* | 34.9* | 19.3 | 35.4* | 7.00* | 2.48 | 861* | 17.2 |
| <b>CUW</b>  | 54.5* | 21.1* | 11.5 | 40.8* | 3.33* | 1.35 | 548* | 11   |
| <b>CDDW</b> | 50.6* | 26.4* | 9.62 | 38.4* | 4.20* | 1.61 | 115* | 2.31 |
| <b>CSS</b>  | 58.5* | 23.8* | 13.9 | 40.9* | 4.84* | 1.97 | 698* | 14   |
| <b>FLW</b>  | 57.5  | 53.6  | 30.9 | 36.9* | 10.9* | 4.02 | 921* | 18.4 |

\* Data from López et al. (2021) [16]

The abundance of the acid sites,  $M_{T,HS}$  and  $M_{T,DOM}$  (expressed in mol kg<sub>compost</sub><sup>-1</sup>) were calculated attending to the values of  $M_T$  from each extract (Table S2, expressed in mmol g<sup>-1</sup>) and to  $C_{HS}$  or  $C_{DOM}$  (Table S3, expressed in gC kg<sub>compost</sub><sup>-1</sup>), using equations (S3) and (S4).

$$M_{T,HS} = M_T \times C_{HS} \quad (S3)$$

$$M_{T,DOM} = M_T \times C_{DOM} \quad (S4)$$

**Table S3:** Identification of the compost and fertiliser samples characterized in the present work.

| SAMPLE                                             | COMPOSTING METHODOLOGY | RAW MATERIAL                                                                                                                                                                     |
|----------------------------------------------------|------------------------|----------------------------------------------------------------------------------------------------------------------------------------------------------------------------------|
| Compost of urban waste ( <b>CUW</b> )              | Tunnel composting      | Selective collection of household food waste, food waste from restaurants, canteen, markets, fairs, festivities, pilgrimages and events, green waste from cemetery and household |
| Vermicompost of algae ( <b>CVA</b> )               | Vermicomposting        | 60% animal waste and 40% vegetable remains (fruits and algae), digested by <i>Eisenia foetida</i> earthworms.                                                                    |
| Vermicompost of domestic waste ( <b>CVDW</b> )     |                        | Green waste (flowers, leaves, grass, fruit peels) and brown waste (straw, dry leaves, dry grass), digested by <i>Eisenia foetida</i> or <i>Lumbricus rubellus</i> earthworms.    |
| Compost of livestock waste ( <b>CLW</b> )          | Pile composting        | 100% animal waste (a mixture of 5% sheep manure without straw, 25% chicken manure and 70% pig manure)                                                                            |
| Compost of algae ( <b>CA</b> )                     |                        | 60% animal waste and 40% vegetable remains (fruits and algae).                                                                                                                   |
| Compost of sewage sludge ( <b>CSS</b> )            |                        | Forestry waste, sludge from urban wastewater treatment and sludge from local effluent treatment.                                                                                 |
| Domestic compost of domestic waste ( <b>CDDW</b> ) | Domestic Composting    | Green waste (flowers, leaves, grass, fruit peels) and brown waste (straw, dried leaves, dried grass).                                                                            |
| <b>ORGANIC FERTILISER</b>                          |                        |                                                                                                                                                                                  |
| Fertiliser of livestock waste ( <b>FLW</b> )       | -                      | 100% animal waste (chicken manure).<br>Mixture subjected to a high temperature to eliminate pathogens.                                                                           |

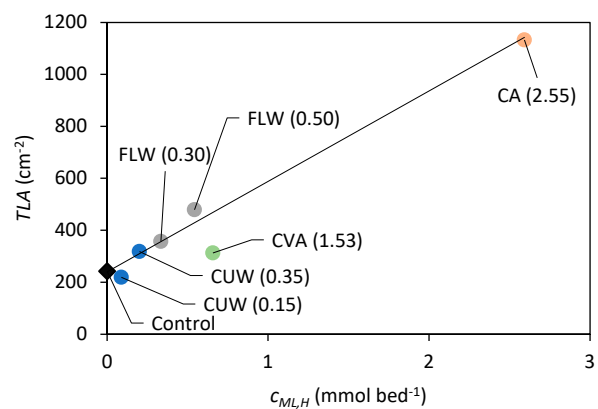

**Figure S1:** Correlation between the total leaf area ( $TLA$ ) of lettuce from a crop field assay and the parameters  $c_{ML,H}$  ( $0.30 \mu\text{mol L}^{-1}$ ) obtained from metal titrations of the HA extracts.

**Table S4:** Data from C/N molecular ratio of the compost and fertiliser samples. Adapted from [3]

| CVA  | CVDW | CA   | CLW  | CUW  | CDDW | CSS | FLW  |
|------|------|------|------|------|------|-----|------|
| 12.5 | 9.2  | 9.97 | 12.8 | 12.6 | 10.3 | 8.6 | 13.2 |
